# Supplementary material for: Real-World Safety and Effectiveness of a 4-Factor Prothrombin Complex Concentrate in Japanese Patients Experiencing Major Bleeding: A Post-marketing Surveillance Study
Source: Springer Nature journal article supplement (doi:10.1007/s40119-024-00357-6), 2024-02-06
Supplement: MOESM1 [file 26706402]

## **Supplementary materials**

**Title:** Real-World Safety and Effectiveness of a 4-Factor Prothrombin Complex Concentrate in Japanese Patients Experiencing Major Bleeding: A Post-Marketing Surveillance Study

**Authors:** Masahiro Yasaka, Michiyasu Suzuki, Shigeki Kushimoto, Ayako Kiyonaga, Antoinette Mangione, Yuki Niwa, Naoki Terasaka

M. Yasaka: Cerebrovascular Medicine and Neurology, National Hospital Organization Kyushu Medical Center, Fukuoka Japan / Cerebrovascular Medicine, Fukuoka Neurosurgical Hospital, Fukuoka, Japan; M. Suzuki: Yamaguchi University Graduate School of Medicine, Department Neurosurgery, Manaka Hospital, Yamaguchi, Japan; S. Kushimoto: Division of Emergency and Critical Care Medicine, Tohoku University Graduate School of Medicine, Sendai, Miyagi, Japan; A. Mangione: CSL Behring, King of Prussia, PA, USA; A. Kiyonaga, Y. Niwa, N. Terasaka: CSL Behring K.K., Kita-Aoyama Minato-ku, Tokyo, Japan

**Corresponding Author:** Naoki Terasaka, email: [Naoki.Terasaka@cslbehring.com](mailto:Naoki.Terasaka@cslbehring.com);

**S-Table 1** Patient characteristics at baseline (Overall study populations and VKA treatment)

| Characteristics                            |             | Overall study populations<br>(n=1381) | With VKA treatment<br>(n=1271) |
|--------------------------------------------|-------------|---------------------------------------|--------------------------------|
| Sex, male, n (%)                           |             | 848 (61.4)                            | 776 (61.1)                     |
| Age, years, mean (SD)                      |             | 74.0 (14.2)                           | 74.3 (14.0)                    |
| Age group, years, n (%)                    | <65         | 236 (17.1)                            | 213 (16.8)                     |
|                                            | ≥ 65 to <75 | 347 (25.1)                            | 315 (24.8)                     |
|                                            | ≥ 75 to <85 | 507 (36.7)                            | 469 (36.9)                     |
|                                            | ≥ 85        | 290 (21.0)                            | 273 (21.5)                     |
| Weight, kg, mean (SD)                      |             | 56.0 (12.9)                           | 56.0 (12.9)                    |
| BMI, mean (SD)                             |             | 21.9 (3.9)                            | 21.9 (3.9)                     |
| Comorbidity, n (%)                         |             | 1126 (81.5)                           | 1040 (81.8)                    |
| Dose of 4F-PCC, IU/kg (SD)                 |             | 28.4 (9.7)                            | 28.5 (9.4)                     |
| Baseline PT-INR, median (minimum, maximum) | Median      | 2.6 (0.92-27.11)                      | 2.6 (0.92-7.11)                |
| Distribution of baseline PT-INR, n (%)     | <1.6        | 134 (9.7)                             | 78 (6.1)                       |
|                                            | 1.6-<2.0    | 153 (11.1)                            | 137 (10.8)                     |
|                                            | 2.0-<4.0    | 727 (52.6)                            | 705 (55.5)                     |
|                                            | 4.0-6.0     | 140 (10.1)                            | 137 (10.8)                     |
|                                            | 6.01-<10.0  | 94 (6.8)                              | 89 (7.0)                       |
|                                            | ≥10.0       | 57 (4.1)                              | 56 (4.4)                       |

|                                           |                        |          |            |
|-------------------------------------------|------------------------|----------|------------|
|                                           | Not available          | 76 (5.5) | 69 (5.4)   |
| Reasons for the utilization of VKA, n (%) | Atrial fibrillation    |          | 619 (48.7) |
|                                           | Valvular heart disease |          | 210 (16.5) |
|                                           | Cerebral infarction    |          | 105 (8.3)  |
|                                           | VTE                    |          | 79 (6.2)   |
|                                           | Other                  |          | 231 (18.2) |
|                                           | Not available          |          | 107 (8.4)  |

BMI, body mass index; IU, international units; PT-INR, prothrombin time international normalized ratio; SD, standard deviation; VKA, vitamin K antagonist; VTE, venous thromboembolism.

**S-Table 2** Types of 31 TEEs of 20 patients who experienced TEEs

|                |                                  | <b>31 TEEs</b> |
|----------------|----------------------------------|----------------|
| Type of TEE, n | Cerebral infarction              | 6              |
|                | Embolic stroke                   | 3              |
|                | Deep vein thrombosis             | 3              |
|                | Haemorrhagic cerebral infarction | 2              |
|                | Thrombosis in device             | 2              |
|                | Carotid arterial embolus         | 1              |
|                | Cerebral artery embolism         | 1              |
|                | Hemiplegia                       | 1              |
|                | Monoplegia                       | 1              |
|                | Carotid artery occlusion         | 1              |
|                | Embolic cerebral infarction      | 1              |
|                | Myocardial infarction            | 1              |
|                | Intracardiac thrombus            | 1              |
|                | Embolism arterial                | 1              |
|                | Iliac artery embolism            | 1              |
|                | Venous thrombosis limb           | 1              |
|                | Arterial occlusive disease       | 1              |
|                | Femoral artery embolism          | 1              |
|                | Pulmonary artery thrombosis      | 1              |
| Renal infarct  | 1                                |                |

TEEs, Thromboembolic events.
